# Supplementary material
Source: PubMed Central journal article supplement (PMC5905676)
Supplement: NIHMS957784-supplement-Diploid_blastocyst_injection_results.pdf [file NIHMS957784-supplement-Diploid_blastocyst_injection_results.pdf]

**Supplementary Table 1. Diploid blastocyst injection results**

| Cell line | Sex | Condition | Passage | Embryos-transferred | Resorptions | Breathing pups | Adult chimeras |
|-----------|-----|-----------|---------|---------------------|-------------|----------------|----------------|
| J-34      | XY  | S/L       | 10      | 30                  | N/D         | 12             | 6              |
| J-35      | XY  | S/L       | 10      | 30                  | N/D         | 15             | 11             |
| J-34      | XY  | 2i/L      | 10      | 70                  | N/D         | 29             | 7              |
| J-35      | XY  | 2i/L      | 10      | 80                  | N/D         | 32             | 8              |
| J-30      | XX  | S/L       | 10      | 60                  | 9           | 9              | 3              |
| J-31      | XX  | S/L       | 10      | 88                  | 11          | 11             | 4              |

Breakdown of cell lines, culture conditions, and passage numbers of cells used to inject into host 2N blastocysts to determine chimerism in mice. N/D, not determined. Resorption, fetus that were resorbed during pregnancy. Breathing, mice that were able to breath on their own after birth. Chimeras, mice that were 5 weeks of age with any visible agouti coat color contribution.
