# Supplementary material
Source: PubMed Central journal article supplement (PMC5905676)
Supplement: NIHMS957784-supplement-Karyotyping_analyses.pdf [file NIHMS957784-supplement-Karyotyping_analyses.pdf]

Table 3. Karyotyping analyses

| Sex | Condition | Passage | number of cells counted | number of abnormal cells* | % abnormal* | TOTAL % abnormal | Count                       | Karyotype                                                                                | comments                                                                                         |
|-----|-----------|---------|-------------------------|---------------------------|-------------|------------------|-----------------------------|------------------------------------------------------------------------------------------|--------------------------------------------------------------------------------------------------|
| XY  | S/L       | 20      | 10                      | 0                         | 0%          | 7%               | 10                          | 40XY                                                                                     |                                                                                                  |
| XY  | S/L       | 20      | 10                      | 1                         | 10%         |                  | 9                           | 40XY                                                                                     |                                                                                                  |
| XY  | S/L       | 20      | 10                      | 1                         | 10%         |                  | 1                           | 40XY,+1                                                                                  |                                                                                                  |
| XY  | S/L       | 20      | 10                      | 1                         | 10%         | 7%               | 9                           | 40XY                                                                                     |                                                                                                  |
| XY  | S/L       | 20      | 10                      | 1                         | 10%         |                  | 1                           | 40XY,+mar                                                                                | marker of unknown origin                                                                         |
| XY  | 2i/L      | 10      | 10                      | 0                         | 0%          | 0%               | 10/10                       | 40XY                                                                                     |                                                                                                  |
| XY  | 2i/L      | 10      | 10                      | 0                         | 0%          |                  | 9/10                        | 40XY                                                                                     |                                                                                                  |
| XY  | 2i/L      | 10      | 10                      | 0                         | 0%          |                  | 1/10                        | 39X,-Y                                                                                   |                                                                                                  |
| XY  | 2i/L      | 10      | 10                      | 0                         | 0%          |                  | 9/10                        | 40XY                                                                                     |                                                                                                  |
| XY  | 2i/L      | 10      | 10                      | 0                         | 0%          |                  | 1/10                        | 39X,-Y                                                                                   |                                                                                                  |
| XY  | 2i/L      | 20      | 20                      | 20                        | 100%        | 100%             | 2/20                        | 42XY,+8,+19                                                                              |                                                                                                  |
| XY  | 2i/L      | 20      | 20                      | 20                        | 100%        |                  | 3/20                        | 42X,-Y,+8,+19                                                                            |                                                                                                  |
| XY  | 2i/L      | 20      | 20                      | 20                        | 100%        |                  | 8/20                        | 43XY,+6,+8,+19                                                                           |                                                                                                  |
| XY  | 2i/L      | 20      | 20                      | 20                        | 100%        |                  | 2/20                        | 42X,-Y,+6,+8,+19                                                                         |                                                                                                  |
| XY  | 2i/L      | 20      | 20                      | 20                        | 100%        |                  | 2/20                        | 43XY,+iso 6,+8,+19                                                                       | iso = isochromosome                                                                              |
| XY  | 2i/L      | 20      | 20                      | 20                        | 100%        |                  | 1/20                        | 44XY,+Y,+iso 6,+8,+19                                                                    | iso = isochromosome                                                                              |
| XY  | 2i/L      | 20      | 20                      | 20                        | 100%        |                  | 2/20                        | 42X,-Y,+iso 6,+8,+19                                                                     | iso = isochromosome                                                                              |
| XY  | 2i/L      | 20      | 20                      | 20                        | 100%        |                  | 20/20                       | 41X,-Y,Rb(Y.6),+6,+8                                                                     | Rb(Y.6) = robertsonian translocation between the Y chromosome and chromosome 6                   |
| XY  | **2i/L    | 20      | 20                      | 20                        | 100%        |                  | 19/20                       | 42XY,T(1F;4E2),+6,+8                                                                     | T(1F;4E2) = balanced translocation between chromosomes 1 and 4, with breakpoints at band F and E |
| XY  | 2i/L      | 20      | 20                      | 20                        | 100%        |                  | 1/20                        | 42XY,+6,+8                                                                               |                                                                                                  |
| XY  | 2i/L      | 20      | 20                      | 20                        | 100%        | 17/20            | 42XY,+6,+8                  |                                                                                          |                                                                                                  |
| XY  | 2i/L      | 20      | 20                      | 20                        | 100%        | 2/20             | 41X,-Y,+6,+8                |                                                                                          |                                                                                                  |
| XY  | 2i/L      | 20      | 20                      | 20                        | 100%        | 1/20             | 43XY,+6,+8,+19              |                                                                                          |                                                                                                  |
| XY  | S/L+PD    | 20      | 20                      | 6                         | 30%         | 30%              | 2/20                        | 40X,-Y,+11                                                                               |                                                                                                  |
| XY  | S/L+PD    | 20      | 20                      | 6                         | 30%         |                  | 1/20                        | 40X,-Y,+mar                                                                              | marker of unknown origin                                                                         |
| XY  | S/L+PD    | 20      | 20                      | 6                         | 30%         |                  | 1/20                        | 40X,-Y,+15                                                                               |                                                                                                  |
| XY  | S/L+PD    | 20      | 20                      | 6                         | 30%         |                  | 1/20                        | 40X,-Y,+mar1                                                                             | marker from chromosome 1                                                                         |
| XY  | S/L+PD    | 20      | 20                      | 6                         | 30%         |                  | 1/20                        | 41X,-Y,+15,+mar1                                                                         | marker from chromosome 1                                                                         |
| XY  | S/L+PD    | 20      | 20                      | 6                         | 30%         | 14/20            | 39X,-Y                      |                                                                                          |                                                                                                  |
| XY  | S/L+CHIR  | 20      | 20                      | 2                         | 10%         | 10%              | 14/20                       | 40XY                                                                                     |                                                                                                  |
| XY  | S/L+CHIR  | 20      | 20                      | 2                         | 10%         |                  | 4/20                        | 39X,-Y                                                                                   |                                                                                                  |
| XY  | S/L+CHIR  | 20      | 20                      | 2                         | 10%         |                  | 1/20                        | 40X,-Y,+mar                                                                              | marker of unknown origin                                                                         |
| XY  | S/L+CHIR  | 20      | 20                      | 2                         | 10%         |                  | 1/20                        | 40XY,-16,+mar                                                                            | marker of unknown origin. Clonal with other cell                                                 |
| XX  | S/L       | 6       | 10                      | 7                         | 70%         | 63%              | 3/10                        | 40XX                                                                                     |                                                                                                  |
| XX  | S/L       | 6       | 10                      | 7                         | 70%         |                  | 4/10                        | 40XX,add(13q)                                                                            | p arm of chromosome 13 has additional material of unknown origin                                 |
| XX  | S/L       | 6       | 10                      | 7                         | 70%         |                  | 1/10                        | 39X,-X,add(13q)                                                                          | p arm of chromosome 13 has additional material of unknown origin                                 |
| XX  | S/L       | 6       | 10                      | 7                         | 70%         |                  | 1/10                        | 39X,-X                                                                                   |                                                                                                  |
| XX  | S/L       | 6       | 10                      | 7                         | 70%         |                  | 1/10                        | 41X,-X,+10,+19                                                                           |                                                                                                  |
| XX  | S/L       | 6       | 10                      | 2                         | 20%         | 20%              | 8/10                        | 40XX                                                                                     |                                                                                                  |
| XX  | S/L       | 6       | 10                      | 2                         | 20%         |                  | 1/10                        | 39X,-X                                                                                   |                                                                                                  |
| XX  | S/L       | 6       | 10                      | 2                         | 20%         |                  | 1/10                        | 40X,-X,+8                                                                                |                                                                                                  |
| XX  | S/L       | 6       | 10                      | 10                        | 100%        | 100%             | 10/10                       | 41XX,+13                                                                                 |                                                                                                  |
| XY  | a2i/L     | 10      | 10                      | 1                         | 10%         | 5%               | 9/10                        | 40XY                                                                                     |                                                                                                  |
| XY  | a2i/L     | 10      | 10                      | 1                         | 10%         |                  | 1/10                        | 41XY,+19                                                                                 |                                                                                                  |
| XY  | a2i/L     | 10      | 10                      | 0                         | 0%          | 5%               | 10                          | 40XY                                                                                     |                                                                                                  |
| XY  | a2i/L     | 20      | 21                      | 2                         | 10%         | 10%              | 18/21                       | 40XY                                                                                     |                                                                                                  |
| XY  | a2i/L     | 20      | 21                      | 2                         | 10%         |                  | 1/21                        | 39X,-Y                                                                                   |                                                                                                  |
| XY  | a2i/L     | 20      | 21                      | 2                         | 10%         |                  | 2/21                        | 40XY,+10,-19                                                                             |                                                                                                  |
| XY  | a2i/L     | 20      | 20                      | 2                         | 10%         |                  | 16/20                       | 40XY                                                                                     |                                                                                                  |
| XY  | a2i/L     | 20      | 20                      | 2                         | 10%         |                  | 2/20                        | 39X,-Y                                                                                   |                                                                                                  |
| XY  | a2i/L     | 20      | 20                      | 2                         | 10%         | 1/20             | 41XY,+19                    |                                                                                          |                                                                                                  |
| XY  | a2i/L     | 20      | 20                      | 2                         | 10%         | 1/20             | 40XY,der(1)t(1;12),-12,+mar | abnormal chromosome 1, derivative of a (1;12) translocation, marker is of unknown origin |                                                                                                  |
| XY  | PKCi/L    | 10      | 10                      | 2                         | 20%         | 10%              | 8/10                        | 40XY                                                                                     |                                                                                                  |
| XY  | PKCi/L    | 10      | 10                      | 2                         | 20%         |                  | 1/10                        | 39X,-Y, dup(1,E1F)                                                                       | abnormal chromosome 1 with a duplication of bands E1-F                                           |
| XY  | PKCi/L    | 10      | 10                      | 2                         | 20%         |                  | 1/10                        | 42X, iso(Yq),+8,+16                                                                      | iso(Yq) = isochromosome Y (q-arm).                                                               |

|            | Sex | Condition | Passage | number of cells counted | number of abnormal cells* | % abnormal* | TOTAL % abnormal | Count                                               | Karyotype                                                                                                                                                        | comments                                                                                                                                                                                                                             |                                                                      |
|------------|-----|-----------|---------|-------------------------|---------------------------|-------------|------------------|-----------------------------------------------------|------------------------------------------------------------------------------------------------------------------------------------------------------------------|--------------------------------------------------------------------------------------------------------------------------------------------------------------------------------------------------------------------------------------|----------------------------------------------------------------------|
|            | XY  | PKCi/L    | 10      | 10                      | 0                         | 0%          |                  | 10/10                                               | 40XY                                                                                                                                                             |                                                                                                                                                                                                                                      |                                                                      |
|            | XY  | PKCi/L    | 20      | 20                      | 12                        | 60%         | 68%              | 8/20<br>9/20<br>2/20<br>1/20                        | 40XY<br>40XY,dup(1,E1F)<br>39X,-Y,dup(1,E1F)<br>40XY_der(1)                                                                                                      | abnormal chromosome 1 with a duplication of bands E1-F<br>abnormal chromosome 1 with a duplication of bands E1-F<br>non clonal abnormal chromosome 1, different than other E1-F duplications seen                                    |                                                                      |
|            | XY  | PKCi/L    | 20      | 20                      | 15                        | 75%         |                  | 5/20<br>4/20<br>9/20<br>1/20<br>1/20                | 40XY<br>40XY,dup(1,E1F)<br>39X,-Y,dup(1,E1F)<br>40XY,-8,+15<br>38X,-Y,-3,dup(1,E1F)                                                                              | abnormal chromosome 1 with a duplication of bands E1-F<br>abnormal chromosome 1 with a duplication of bands E1-F<br>abnormal chromosome 1 with a duplication of bands E1-F<br>abnormal chromosome 1 with a duplication of bands E1-F |                                                                      |
| P          | XY  | 2i/L      | x+8     | 20                      | 12                        | 60%         | 60%              | 4<br>3<br>1<br>1<br>1<br>1<br>1<br>2<br>1<br>1<br>4 | 39X,-Y<br>40X,-Y,+6<br>41XY,+6<br>41X,-Y,+6,+8<br>40X,-Y,+6,mar9<br>39X,-Y,+6,-10<br>41X,-Y,+11,+19<br>40X,iso(Y),iso(6)<br>40XY,iso(6)<br>40XY_add(7,8)<br>40XY | marker derived from chromosome 9<br>isochromosomes for both Y and 6<br>isochromosome 6<br>add(7,8) = fusion of chromosome 7 and 8.                                                                                                   |                                                                      |
| +) )       | XX  | 2i/L      | 16      | 20                      | 20                        | 100%        |                  | 100%                                                | 13<br>2<br>2<br>2<br>1                                                                                                                                           | 41X,-X,+6,+8<br>42X,-X,+3,+6,+8<br>42X,-X,+6,+8,+14<br>42X,-X,+6,+8,+15<br>43X,-X,+3,+6,+8,+14                                                                                                                                       |                                                                      |
| matomato+) | XX  | 2i/L      | 16      | 20                      | 19                        | 95%         |                  | 95%                                                 | 18<br>1<br>1                                                                                                                                                     | 41XX,+8,+mar1<br>42XX,+8,+16,+mar1<br>40XX                                                                                                                                                                                           | marker derived from chromosome 1<br>marker derived from chromosome 1 |
| +EtOH      | XY  | S/L       | 15      | 10                      | 0                         | 0%          |                  | 0%                                                  | 9<br>1                                                                                                                                                           | 40XY<br>39X,-Y                                                                                                                                                                                                                       |                                                                      |
| +EtOH      | XY  | S/L       | 15      | 10                      | 0                         | 0%          |                  |                                                     | 10                                                                                                                                                               | 40XY                                                                                                                                                                                                                                 |                                                                      |
| +4-OHT     | XY  | S/L       | 15      | 10                      | 0                         | 0%          |                  | 0%                                                  | 10                                                                                                                                                               | 40XY                                                                                                                                                                                                                                 |                                                                      |
| +4-OHT     | XY  | S/L       | 15      | 10                      | 0                         | 0%          |                  |                                                     | 8<br>2                                                                                                                                                           | 40XY<br>39X,-Y                                                                                                                                                                                                                       |                                                                      |

percentage of abnormal cells, we did not count -Y as abnormal if it was the only abnormality. In our experience, Y is commonly unstable regardless of culture conditions cultured in 2i/L without MEF feeder cells for 16 passages (final passage 20).

analysis of every cell line and the duration for which the cells were cultured in indicated indicates the number of cells that were counted/karyotyped.
