# Supplementary material
Source: PubMed Central journal article supplement (PMC5905676)
Supplement: NIHMS957784-supplement-Tetraploid_blastocyst_injection_results.pdf [file NIHMS957784-supplement-Tetraploid_blastocyst_injection_results.pdf]

**Supplementary Table 2. Tetraploid blastocyst injection results**

| Cell line | Sex | Condition | Passage | Embryos-transferred | Full-term | Breathing pups | Adults |
|-----------|-----|-----------|---------|---------------------|-----------|----------------|--------|
| J-34      | XY  | S/L       | 10      | 27                  | 8         | 5              | 4      |
| J-35      | XY  | S/L       | 10      | 18                  | 2         | 2              | 0      |
| J-37      | XY  | S/L       | 10      | 18                  | 3         | 3              | 2      |
| J-34      | XY  | S/L       | 20      | 99                  | 10        | 8              | 8      |
| J-35      | XY  | S/L       | 20      | 77                  | 11        | 7              | 7      |
| J-37      | XY  | S/L       | 20      | 62                  | 5         | 5              | 3      |
| J-34      | XY  | 2i/L      | 10      | 70                  | 1         | 1              | 0      |
| J-35      | XY  | 2i/L      | 10      | 77                  | 6         | 6              | 0      |
| J-37      | XY  | 2i/L      | 10      | 78                  | 2         | 2              | 0      |
| J-34      | XY  | 2i/L      | 20      | 108                 | 2         | 1              | 0      |
| J-35      | XY  | 2i/L      | 20      | 64                  | 2         | 1              | 0      |
| J-37      | XY  | 2i/L      | 20      | 63                  | 0         | 0              | 0      |
| J-30      | XX  | S/L       | 10      | 75                  | 2         | 2              | 0      |
| J-31      | XX  | S/L       | 10      | 82                  | 3         | 3              | 0      |
| J-34      | XY  | a2i/L     | 10      | 30                  | 7         | 7              | 7      |
| J-35      | XY  | a2i/L     | 10      | 30                  | 4         | 4              | 2      |
| J-34      | XY  | a2i/L     | 20      | 30                  | 6         | 6              | 4      |
| J-35      | XY  | a2i/L     | 20      | 30                  | 5         | 5              | 0      |
| J-34      | XY  | PKCi/L    | 10      | 50                  | 6         | 4              | 0      |
| J-35      | XY  | PKCi/L    | 10      | 44                  | 2         | 1              | 1      |

Breakdown of cell lines, culture conditions, and passage numbers of cells used to inject into host 4N blastocysts to determine the ability to generate all-ESC mice. Full-term, mice that were fully developed at the time of birth or cesarian section. Breathing, mice that were able to breath on their own after birth. Adults, mice that lived longer than 5 weeks.
